# Supplementary material for: Flightless-I governs cell fate by recruiting the SUMO isopeptidase SENP3 to distinct HOX genes
Source: Springer Nature journal article supplement (doi:10.1186/s13072-017-0122-8), 2017-03-23
Supplement: MOESM3 [file 13072_2017_122_MOESM3_ESM.pdf]

## Supplemental Experimental Procedures

### Antibodies used for western blot, immunoprecipitation and ChIP

Details of antibodies used for western blot, immunoprecipitation and ChIP are as follows: anti-Ash2L II (A300-489A, Bethyl lab), anti-Menin (cat no. - A300-105A, Bethyl lab), anti-MLL1 (cat no. - A300-086A, A300-374A, Bethyl lab), anti-MLL2/TRX2 (cat no. - A300-113A, Bethyl lab), MLL2/ALR (ABIN731573), anti-RbBP5 (cat no. - A300-109A, Bethyl lab), anti-WDR5 (cat no. - A302-429A Bethyl lab), anti-SET1 (cat no. - A300-086A, Bethyl lab), anti-LAS1L (AV34629, Sigma-Aldrich), anti-FL II (SC-21716, Santa Cruz Biotechnology Inc), anti-LRRFIP1(A303-078A, Bethyl lab), anti-PELP1(A300-180A, Bethyl lab), anti-SEN3 (clone D20A10 cat no. - 5591, Cell signaling), anti-DLX3 (Abcam), anti-Flag (F3165, Sigma-Aldrich) anti-SUMO2/3 (clone 1E7, MBL), anti-RUNX2 (Santa Cruz Biotechnology Inc), anti-RNA Pol II (phospho ser 2) (cat no. – Ab5095, Abcam), anti-RGS His (cat no. – 34610, Qiagen), anti- $\alpha$ tubulin (cat no. – CP06 Calbiochem), anti-H3K4 me3 (cat no. – ab8580, Abcam).

### siRNA sequences and PCR primers

The following siRNA oligos were used in knockdown assays:

Control- CGUACGCGGAAUACUUCGA dTdT

SEN3- ACGUGGACAUCUCAAUAA dTdT

FL II.1 – GCUGGAACACUUGUCUGUG dTdT

FL II.2 – CAACCUGACCACGCUUCA dTdT

The following primer pairs were used for RT-qPCR to amplify cDNA:

GAPDH forward 5' -GGTATCGTGGAAGGACTCATGAC -3'

GAPDH reverse 5' -ATGCCAGTGAGCTTC CCGTTCAG -3'

SENP3 forward 5' -CAAAGTCTCCTCTGGACCCTG -3'  
SENP3 reverse 5' -TGCTGCACACATTGCTGATGAG -3'  
DLX3 forward 5' -ATCGCAAGCTCAGCAGCATC-3'  
DLX3 reverse 5' -TAGCCCAGGTCAGTGACAGAAG-3'  
HOXC8 forward 5' -ACGTGGACTCGCTCATCTCT-3'  
HOXC8 reverse 5' -CGAAGCTACAGGACGGAAAA-3'  
HOXA9 forward 5' -TAAACCTGAACCGCTGTCGGCCAG -3'  
HOXA9 reverse 5' -CCGCCGCTCTCATTCTCAGCATTG -3'  
HOXB3 forward 5' - AGTTCCATTTTAACCGCTACC -3'  
HOXB3 reverse 5' - TTCTTGTA T T C A T T C A T G C G C C -3'  
MEIS1 forward 5' - TGTGACAATTTCTGCCACC -3'  
MEIS1 reverse 5' - CTGAACGAGTAGATGCCGT -3'  
MEOX1 forward 5' - TGCCCATCATAACTACCTGAC -3'  
MEOX1 reverse 5' - ACACGCTTCCACTTCATCC -3'  
RUNX2 forward 5' - GTGCCTAGGCGCATTTC A-3'  
RUNX2 reverse 5' - GCTCTTCTTACTGAGAGTGGAAGG-3'  
ALP forward 5' - CAACCCTGGGGAGGAGAC-3'  
ALP reverse 5' - GCATTGGTGT T T G T A C G T C T T G -3'  
FLII forward 5' - CCTCCTACAGCTAGCAGGTTATCAAC-3'  
FLII reverse 5' - GCATGTGCTGGATATATACCTGGCAG -3'

The following primer pairs were used for the ChIP qPCR to amplify DNA derived from chromatin:

GAPDH forward 5' - TACTAGCGGTTTTACGGGCG -3'  
GAPDH reverse 5' - TCGAACAGGAGGAGCAGAGAGCGA -3'

DLX3.1 forward 5' - ATCAGCGCGTAGGAGCCTC-3'

DLX3.1 reverse 5'- CGTCCCAAGCCACAATCAAAT-3'

DLX3.2 forward 5' - CGCCGTTCCAAGTTCAAGAAAC-3'

DLX3.2 reverse 5' - TGATGGTGGTGAGTTGCAGG-3'

HOXC8 forward 5' - TCTCGCCTGTCTTCATGTC-3'

HOXC8 reverse 5' - TCTCTCACTTAGCTCTTTCCTC-3'
